# Supplementary material for: Predictive role of blood-based indicators in neuromyelitis optica spectrum disorders
Source: Frontiers journal article supplement (doi:10.3389/fnins.2023.1097490), 2023-04-06

**Table S1 ROC curve analysis for distinguishing NMOSD group from HC group**

| Variables | AUC   | P value | 95% CI      | Cut off | sensitivity | specificity |
|-----------|-------|---------|-------------|---------|-------------|-------------|
| NEU       | 0.824 | 0.001   | 0.721-0.887 | 3.97    | 59.3%       | 90.7%       |
| PLT       | 0.622 | 0.028   | 0.517-0.728 | 242     | 70.4%       | 51.9%       |
| NLR       | 0.725 | 0.001   | 0.630-0.820 | 2.14    | 63.0%       | 72.2%       |
| PLR       | 0.610 | 0.049   | 0.502-0.717 | 288.98  | 25.9%       | 100%        |
| SIRI      | 0.659 | 0.004   | 0.556-0.763 | 1.09    | 40.7%       | 88.9%       |
| SII       | 0.741 | <0.001  | 0.649-0.834 | 450.81  | 74.1%       | 64.8%       |

Abbreviations: NEU:neutrophil, PLT:platelet

**Table S2 Treatment regimen and condition of NMOSD and MS patients**

|                                                                                               | NMOSD<br>(n=54) | MS<br>group<br>(n=54) |
|-----------------------------------------------------------------------------------------------|-----------------|-----------------------|
| Therapeutic regimen <sup>a</sup> (n%)                                                         |                 |                       |
| Steroid hormone                                                                               | 20 (37.0)       | -                     |
| Steroid hormone+MMF                                                                           | 26 (48.1)       | -                     |
| Steroid hormone+AZA                                                                           | 5 (9.3)         | -                     |
| Rituximab (n%)                                                                                | 3 (5.6)         | -                     |
| Fingolimod (n%)                                                                               | -               | 22 (40.7)             |
| Terifluramide (n%)                                                                            | -               | 29 (53.7)             |
| Dimethyl fumarate (n%)                                                                        | -               | 3 (5.6)               |
| Mean interval from the first discharge to the first relapse of NMOSD, month (SD) <sup>b</sup> | 6.36 (3.33)     | -                     |
| Mean interval from the last relapse to the current inclusion of MS, month (SD)                | -               | 9.94 (4.14)           |
| Classification of MS (n%)                                                                     |                 |                       |
| RR                                                                                            | -               | 45 (83.3)             |
| SP                                                                                            | -               | 3 (5.6)               |
| PP                                                                                            | -               | 1(1.9)                |
| PR                                                                                            | -               | 1(1.9)                |
| Unkonwn                                                                                       | -               | 4 (7.4)               |

Abbreviations: MMF: mycophenolate mofetil, AZA: azathioprine. RR: relapsing remitting type; SP: secondary progressive type; PP: primary progressive type; PR: progressive relapsing type.

<sup>a</sup>: It means that all medication regimens refer to continuing treatment regimens after discharge, and all NMOSD and MS patients were treated with a steroid pulse therapy upon admission for acute episodes.

<sup>b</sup>: It means that this interval is the mean interval of the 11 patients who relapsed because only 11 patients with NMOSD relapsed during the follow-up period.

**Table S3 Treatment regimen of NMOSD patients with and without relapse**

| Relapse (n=9) |                     |                                                | Without relapse (n=9) |                     |
|---------------|---------------------|------------------------------------------------|-----------------------|---------------------|
| Patient No.   | Therapeutic regimen | Interval from the first discharge to the first | Patient No.           | Therapeutic regimen |

|           |                     |                      |           |                     |
|-----------|---------------------|----------------------|-----------|---------------------|
| Patient 1 | Steroid hormone     | relapse, month<br>11 | Patient 1 | Steroid hormone+MMF |
| Patient 2 | Steroid hormone+MMF | 4                    | Patient 2 | Steroid hormone+MMF |
| Patient 3 | Steroid hormone+MMF | 7                    | Patient 3 | Steroid hormone     |
| Patient 4 | Steroid hormone     | 3                    | Patient 4 | Steroid hormone     |
| Patient 5 | Steroid hormone+MMF | 2                    | Patient 5 | Steroid hormone+MMF |
| Patient 6 | Steroid hormone     | 6                    | Patient 6 | Steroid hormone     |
| Patient 7 | Steroid hormone     | 8                    | Patient 7 | Steroid hormone+MMF |
| Patient 8 | Steroid hormone     | 9                    | Patient 8 | Steroid hormone     |
| Patient 9 | Steroid hormone+AZA | 4                    | Patient 9 | Steroid hormone+MMF |

Abbreviations: MMF: mycophenolate mofetil, AZA: azathioprine.

**Table S4 Differences in hematologic indexes before and after treatment in NMOSD patients treated with different regiments.**

| Paired variables | Steroid hormone<br>(n=9) | Steroid hormone<br>+MMF (n=8) | Steroid hormone<br>+AZA (n=1) |
|------------------|--------------------------|-------------------------------|-------------------------------|
| LYM (P value)    | 0.331                    | 0.239                         | -                             |
| MON (P value)    | 0.313                    | 0.275                         | -                             |
| PLR (P value)    | 0.251                    | 0.338                         | -                             |

Abbreviations: LYM: lymphocyte, MON:monocyte, AZA: azathioprine, MMF: mycophenolate mofetil.

**Figure S1 ROC curve analysis for distinguishing NMOSD group from HC group**

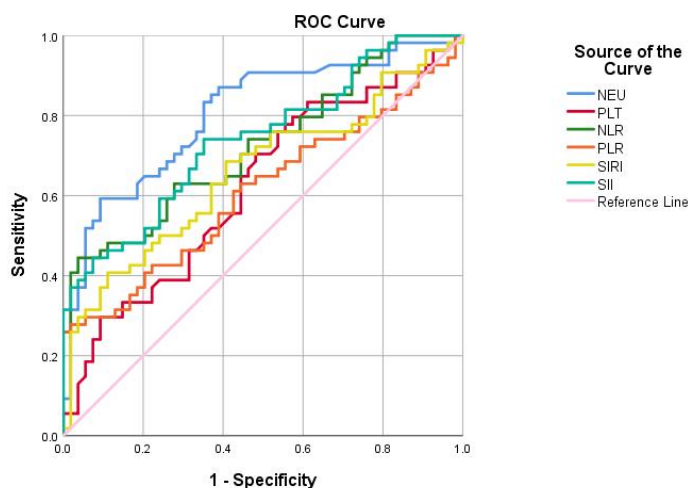

Supplement: Data_Sheet_1.PDF [file Data_Sheet_1.PDF]
